# Supplementary material
Source: Springer Nature journal article supplement (https://www.springermedizin.de/resource/supplementary/12879_2012_2193_MOESM4_ESM.pdf/9443672)
Supplement: MOESM4 [file 9443672]

|        | screened | not<br>screened | total |
|--------|----------|-----------------|-------|
| FSU    | 20       | 33              | 53    |
| Balkan | 62       | 45              | 107   |
| Asia   | 127      | 50              | 177   |
| Africa | 184      | 118             | 302   |
